# Supplementary material
Source: PubMed Central journal article supplement (PMC6857530)

Supp. Fig. 1

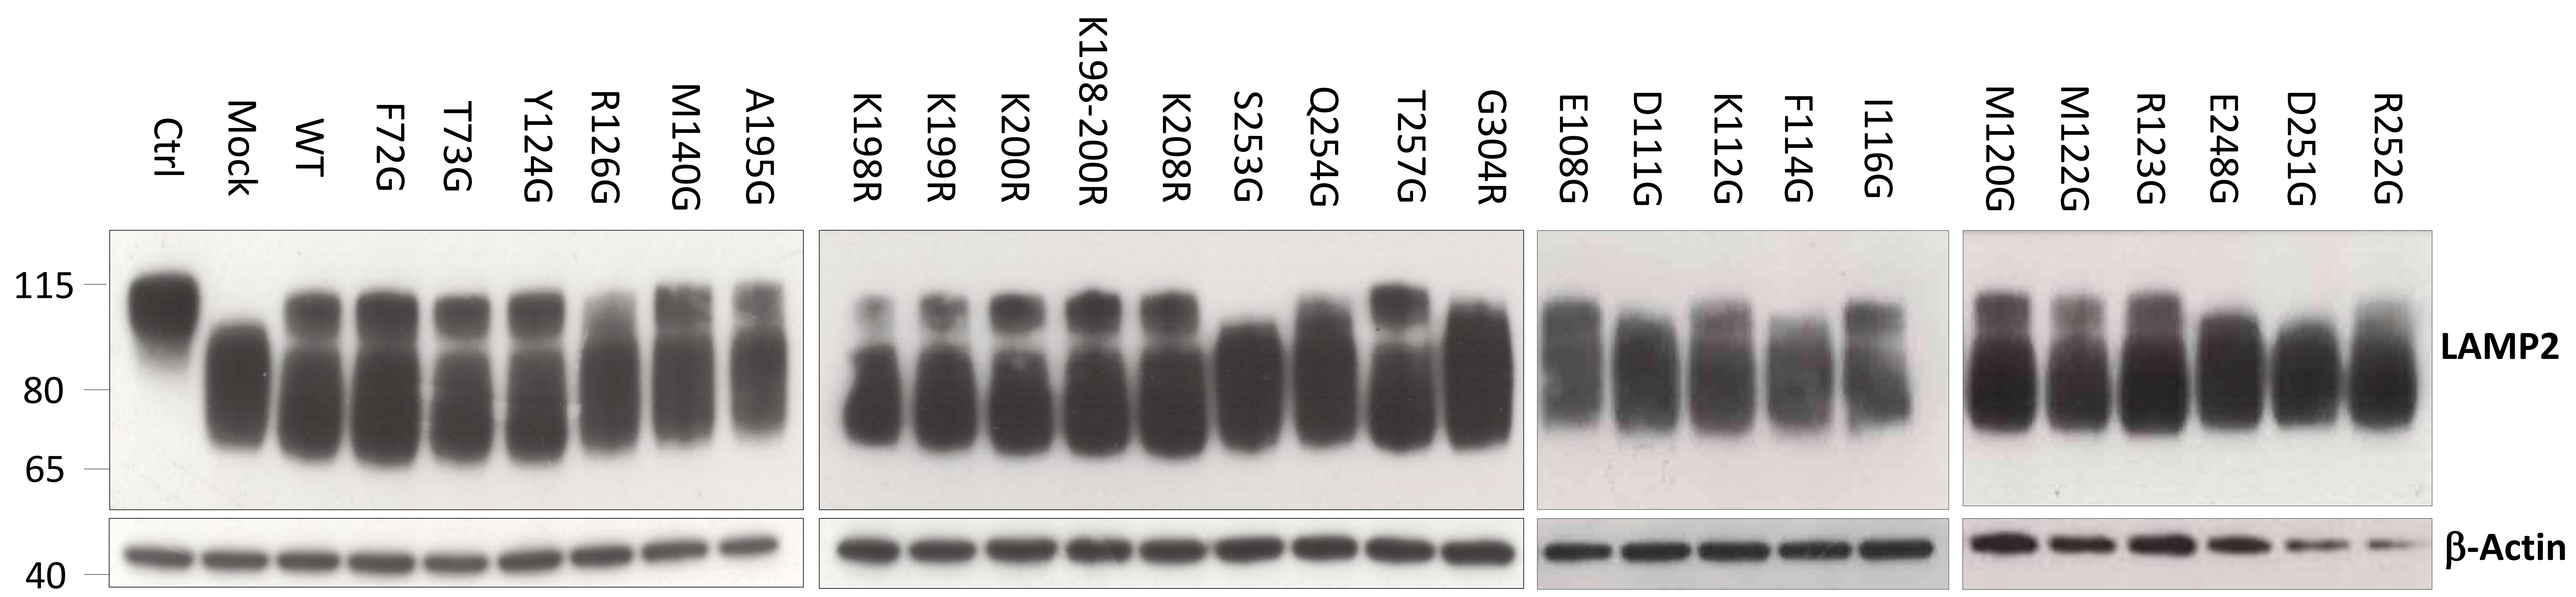

HEK KO TMEM165 + TMEM165-S253G

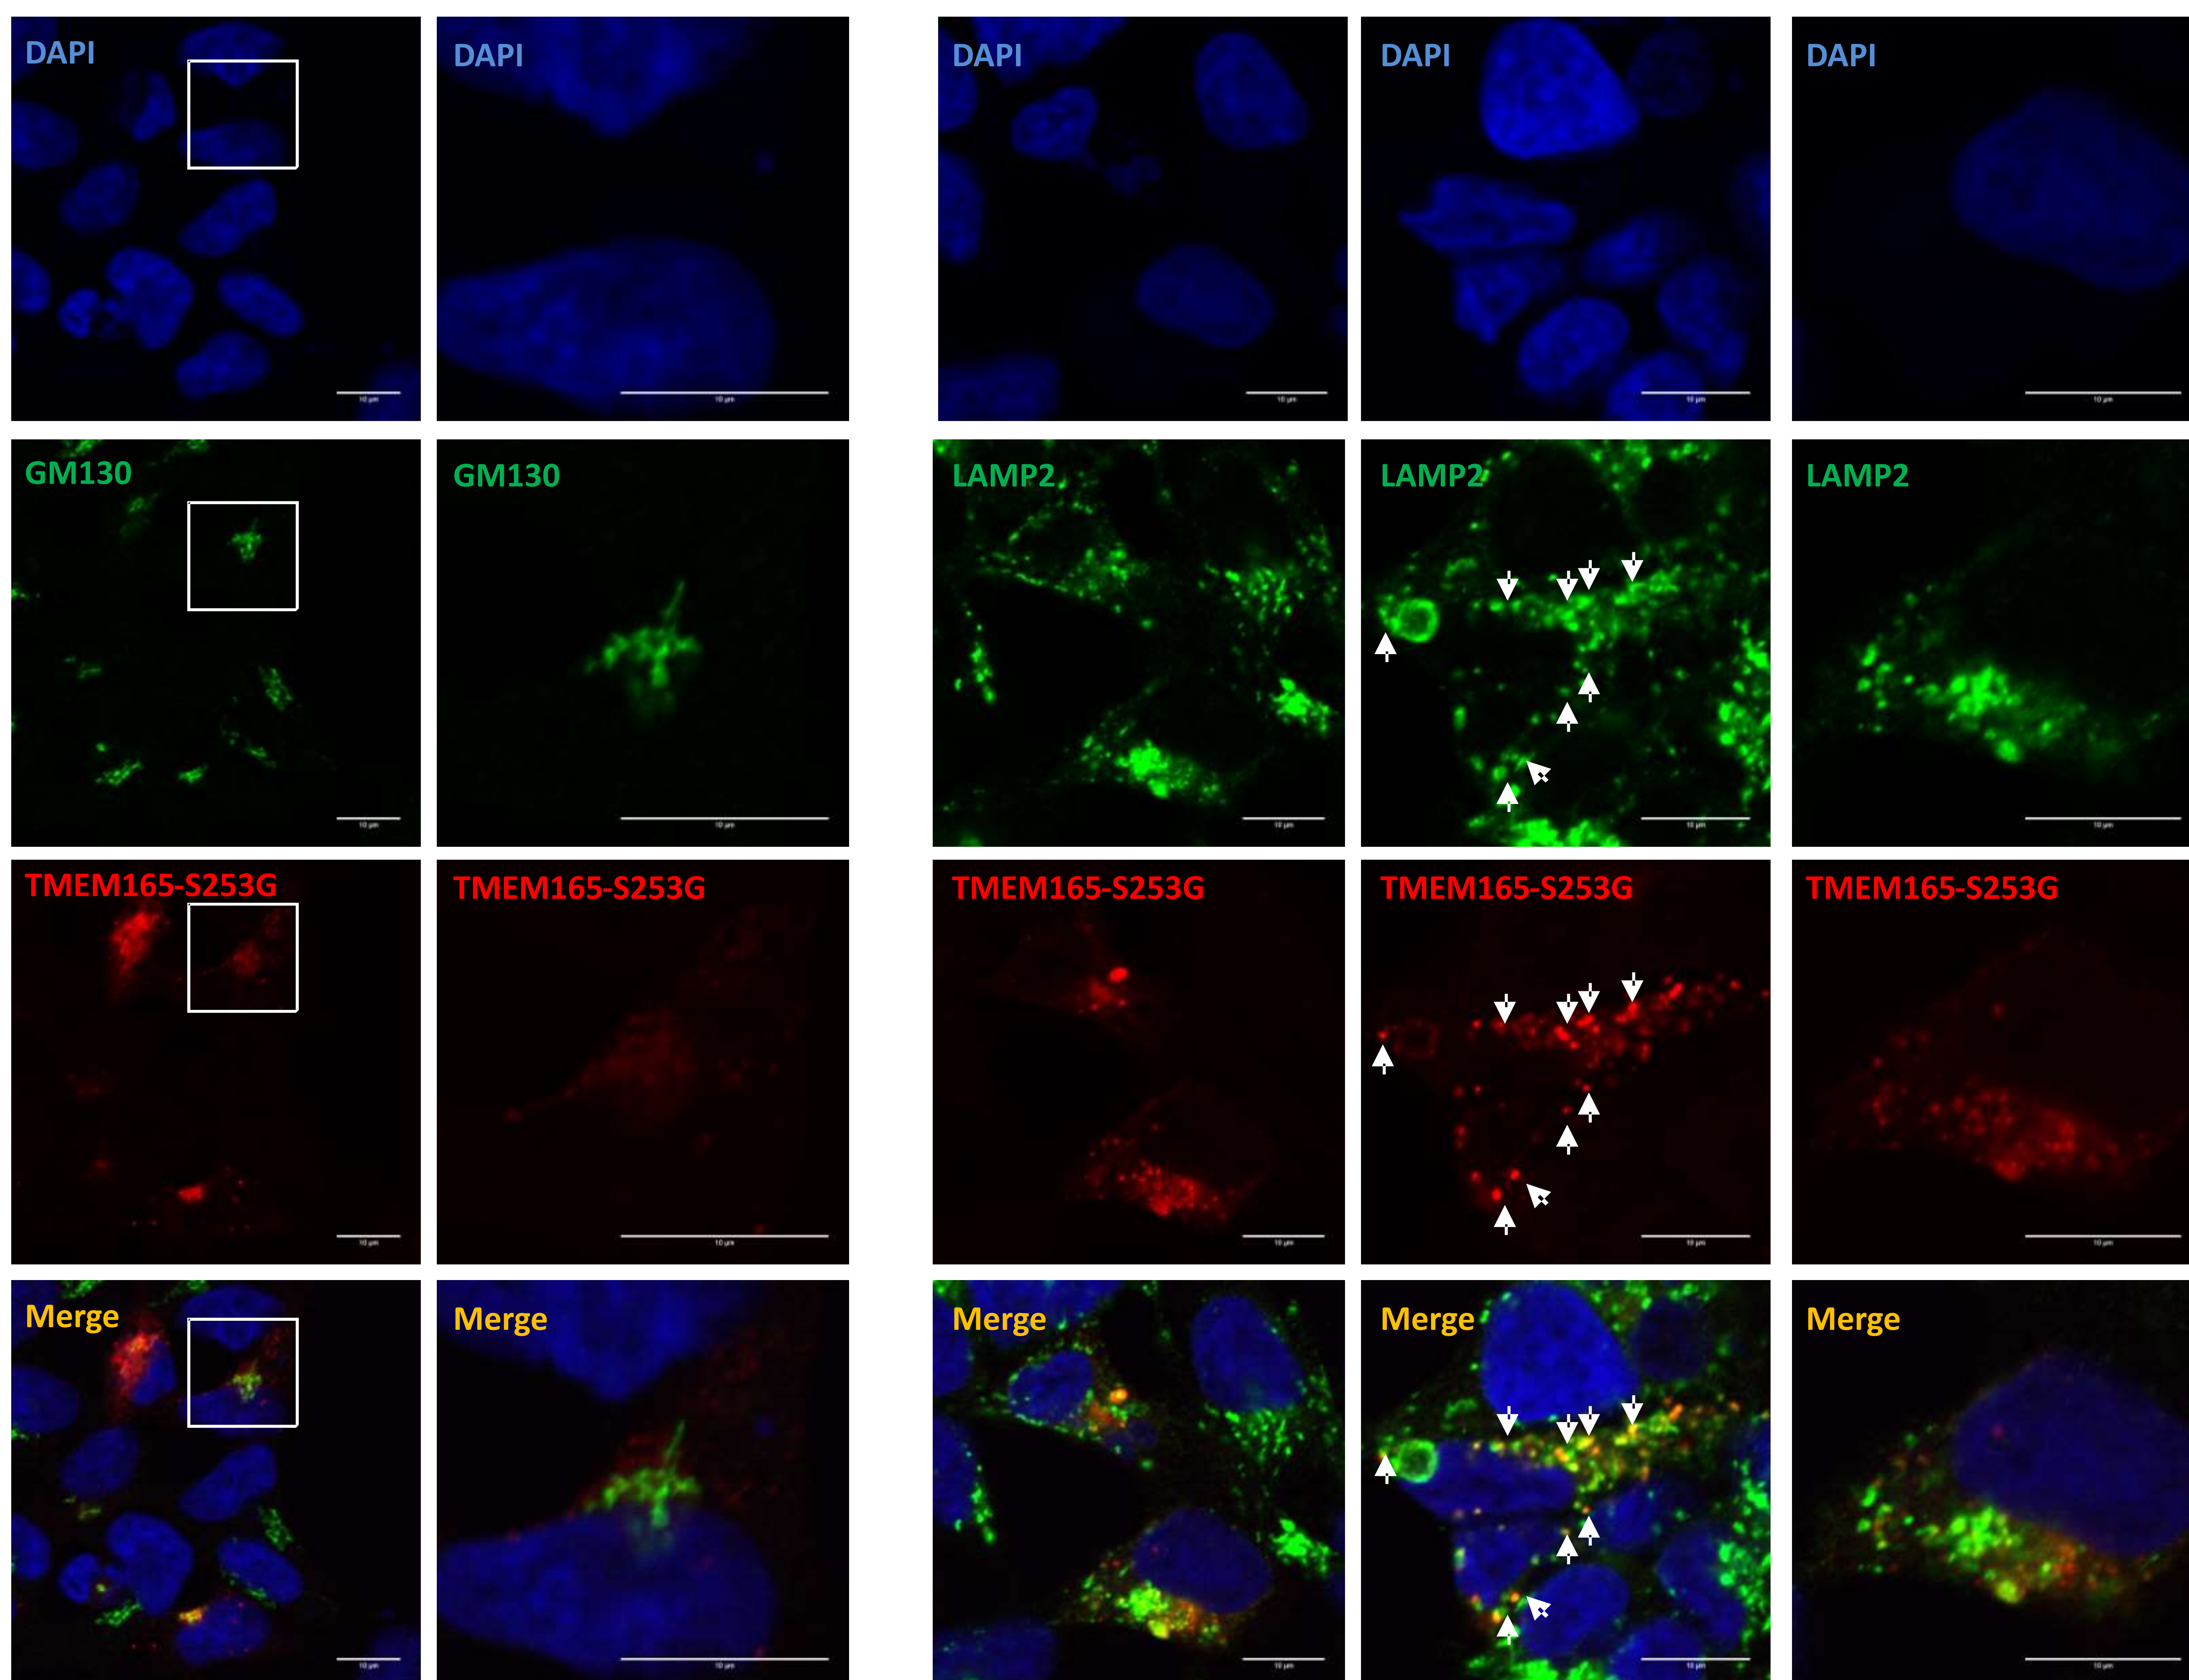

Scale bar: 10μm

HEK KO TMEM165 + TMEM165-D251G

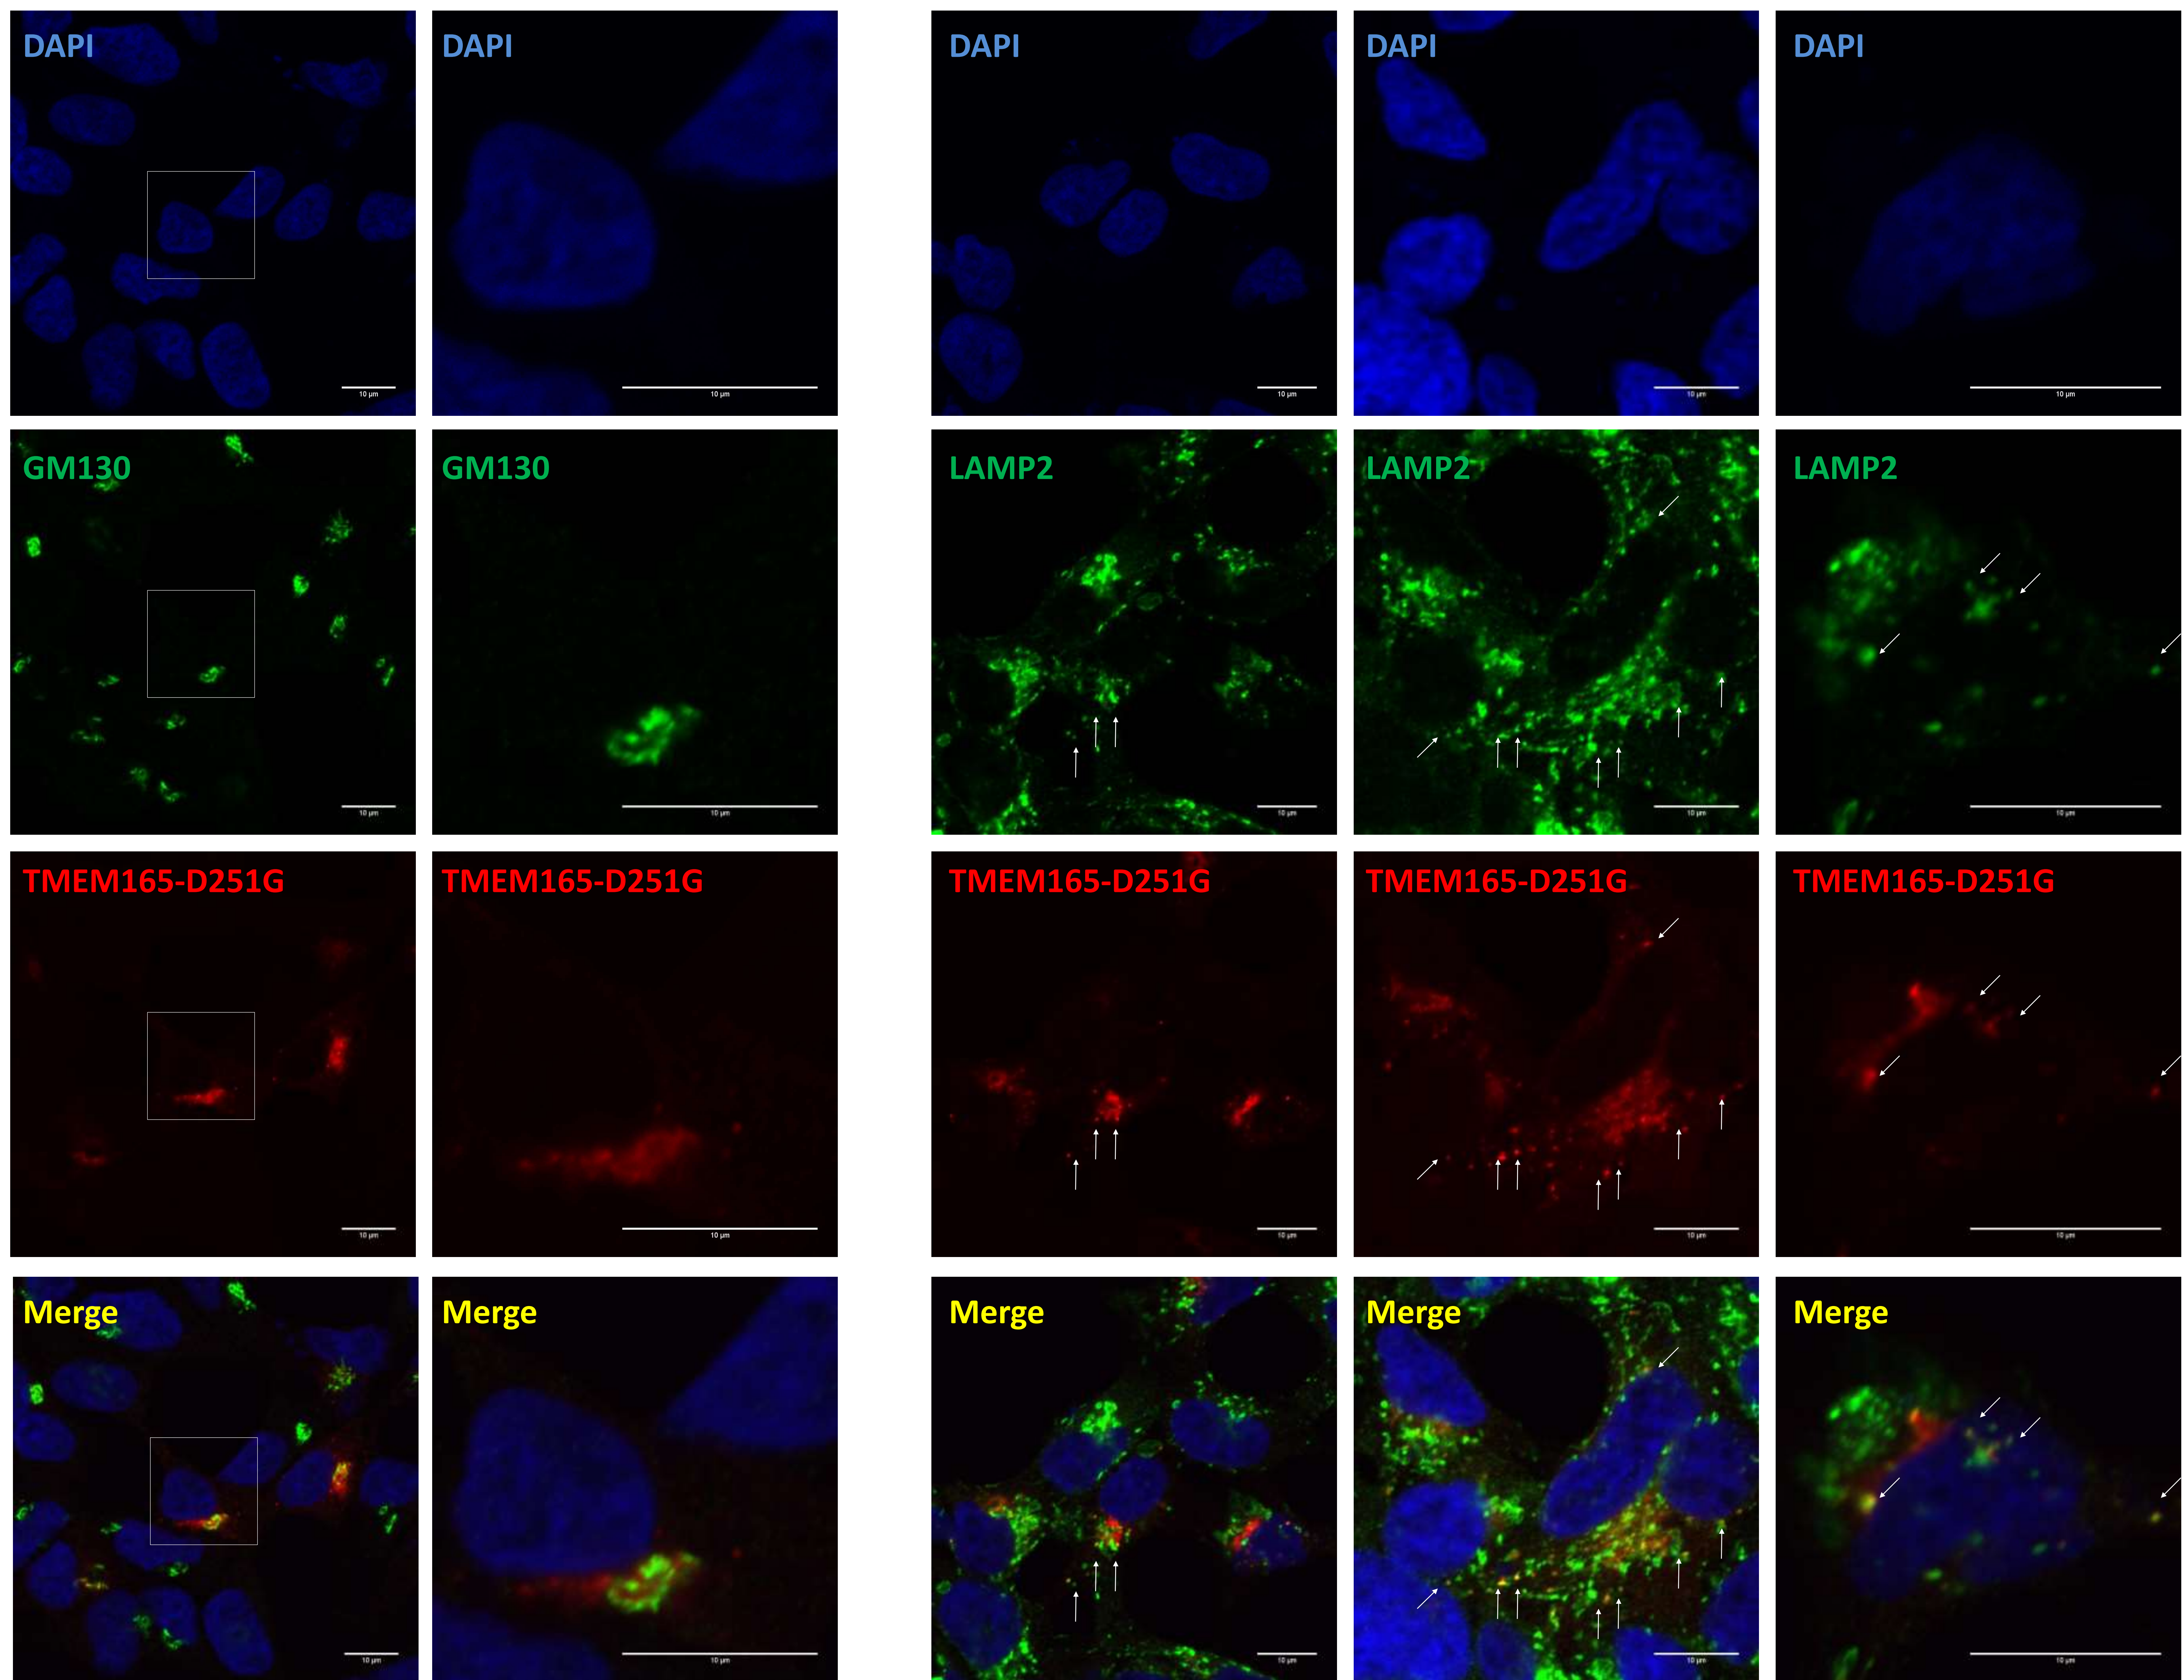

# Supp. Fig. 3

## A.

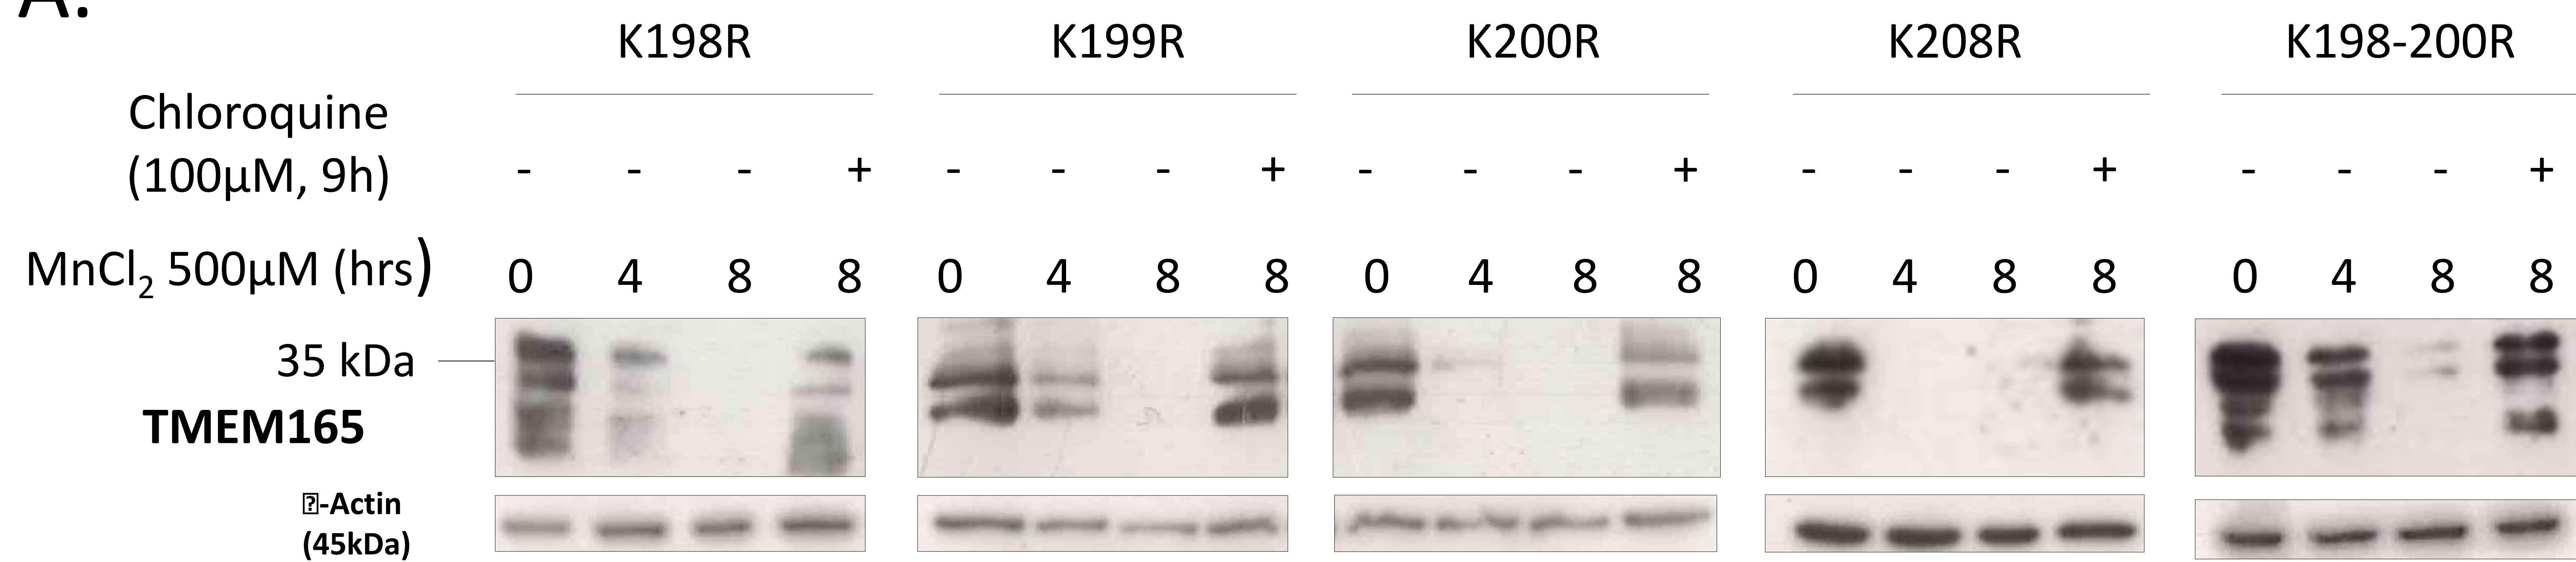

## B.

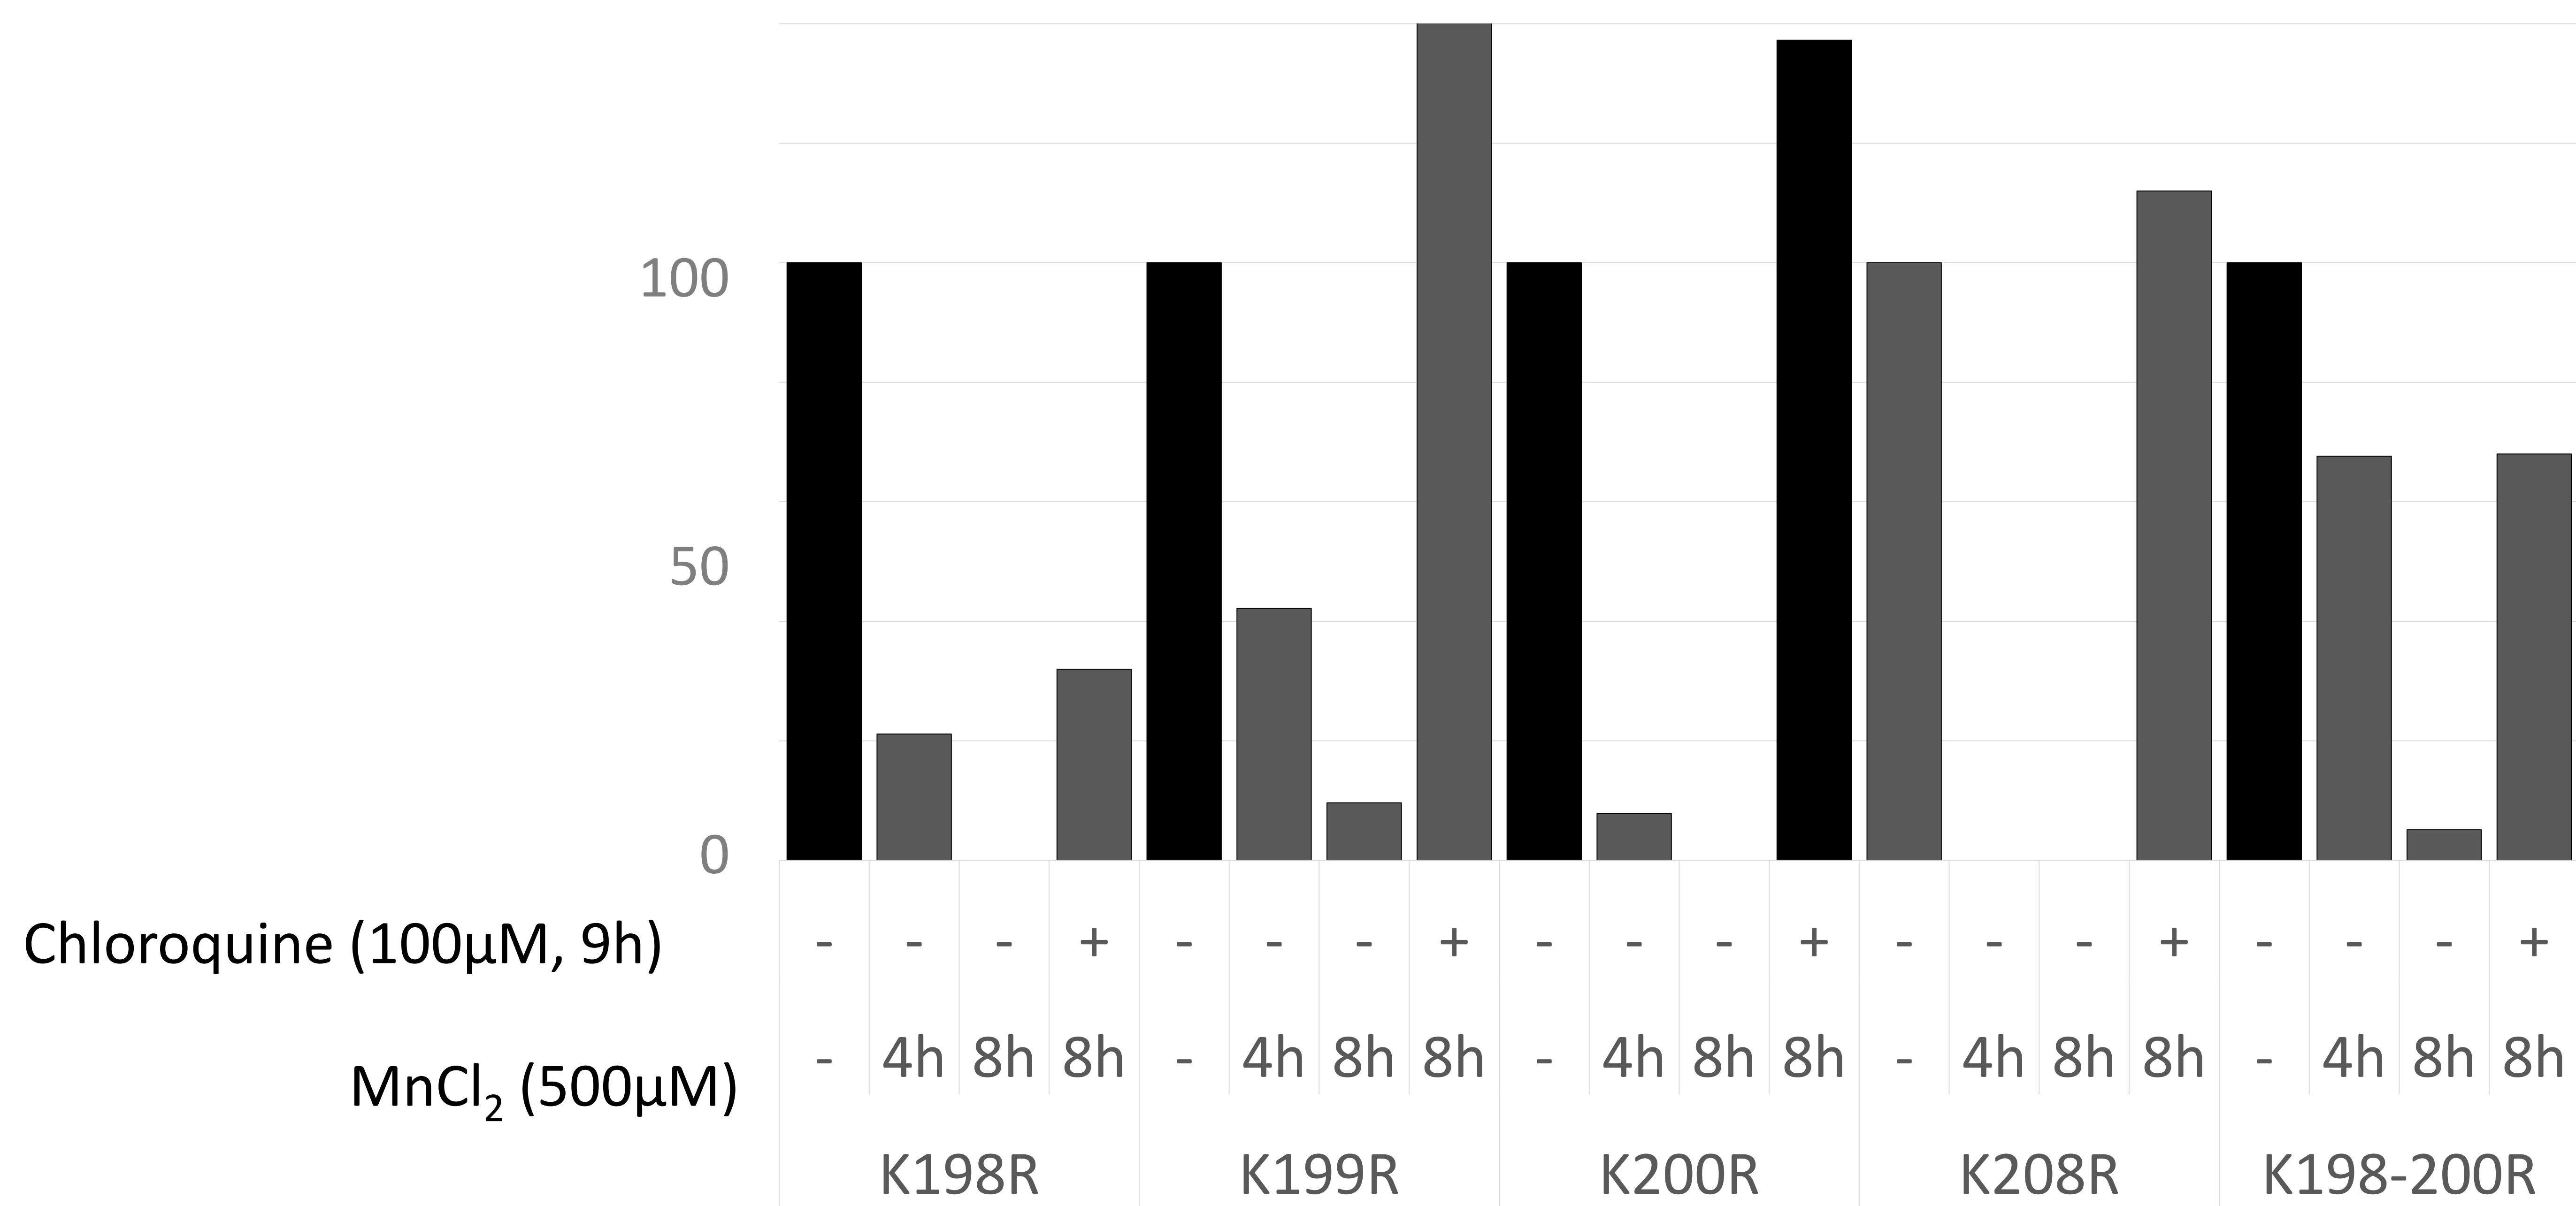

## C.

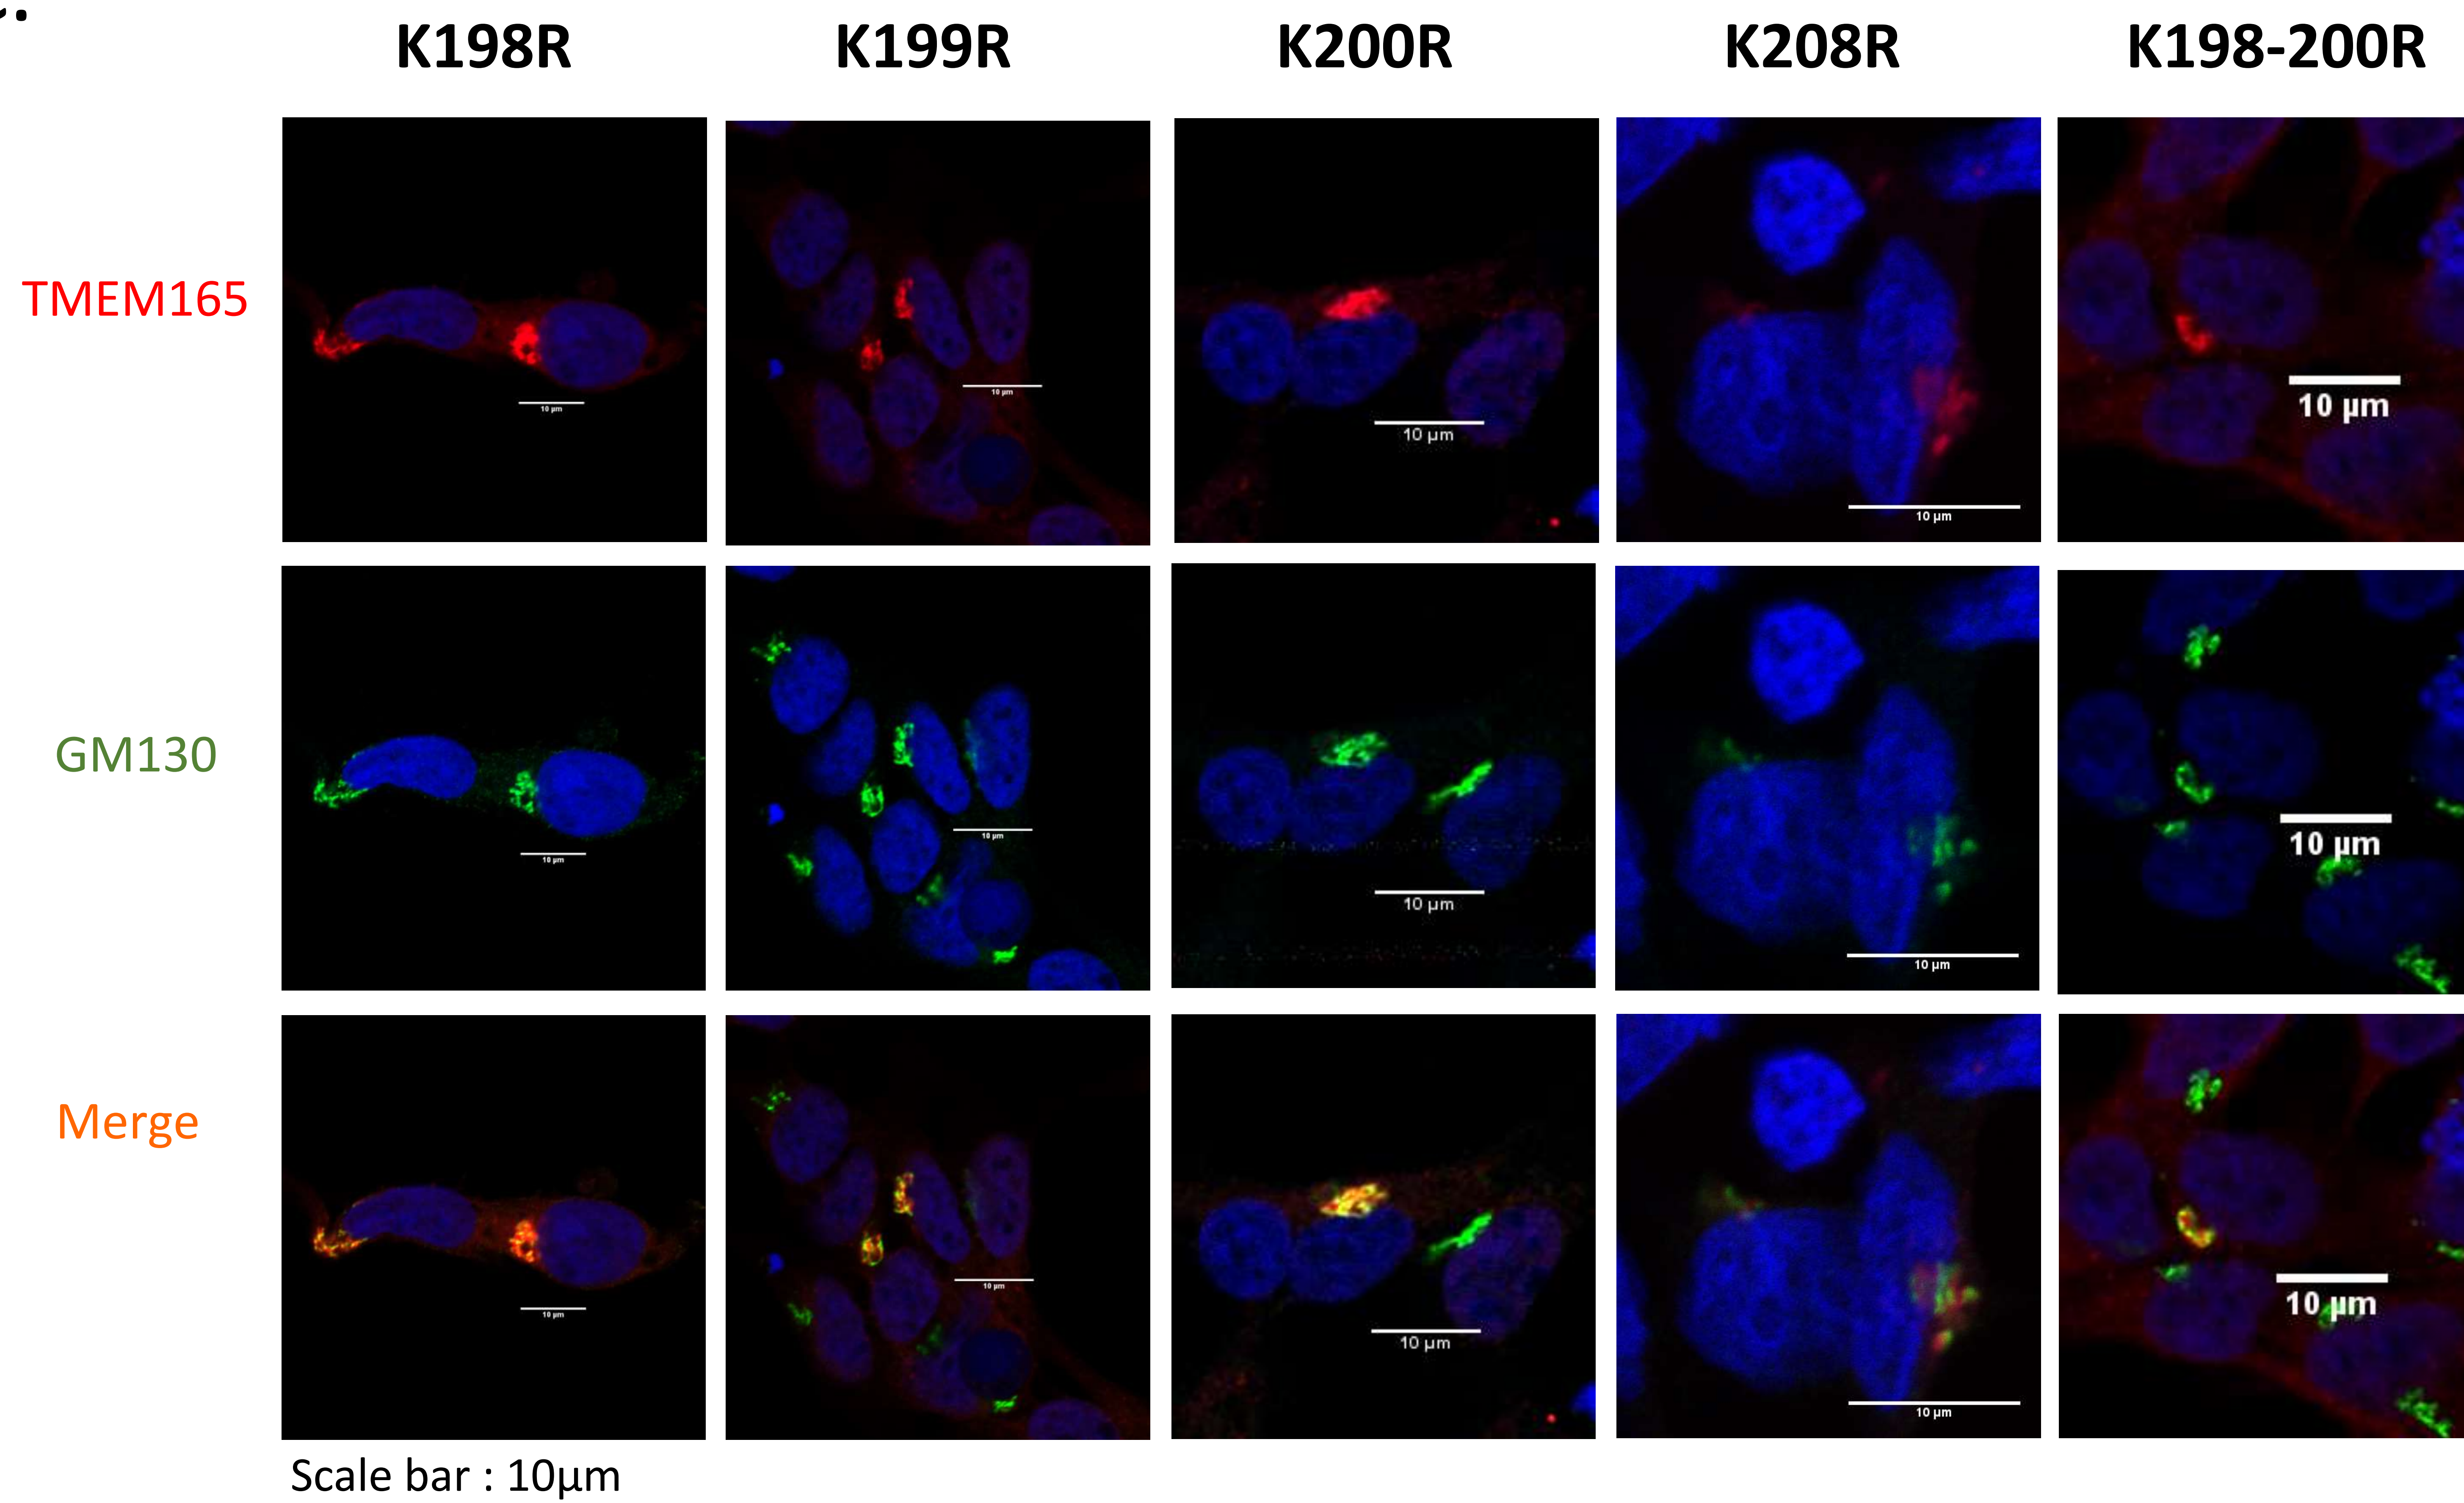

Supplement: NIHMS1053194-supplement-supplement.pdf [file NIHMS1053194-supplement-supplement.pdf]
